# Supplementary figures and images for: Structural characterisation of a layered double hydroxide nanosheet
Source: Royal Society of Chemistry journal article supplement (doi:10.1039/c4nr01265h), 2014-01-01

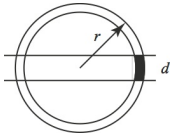

Supplement: c4nr01265h1.pdf [file c4nr01265h1.pdf]

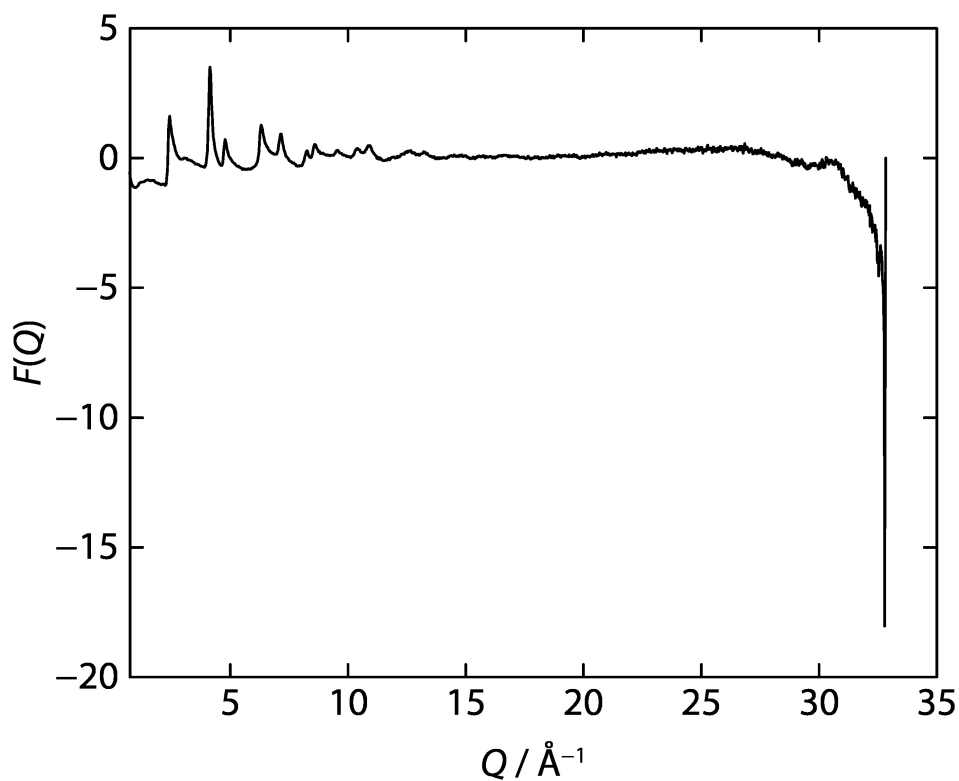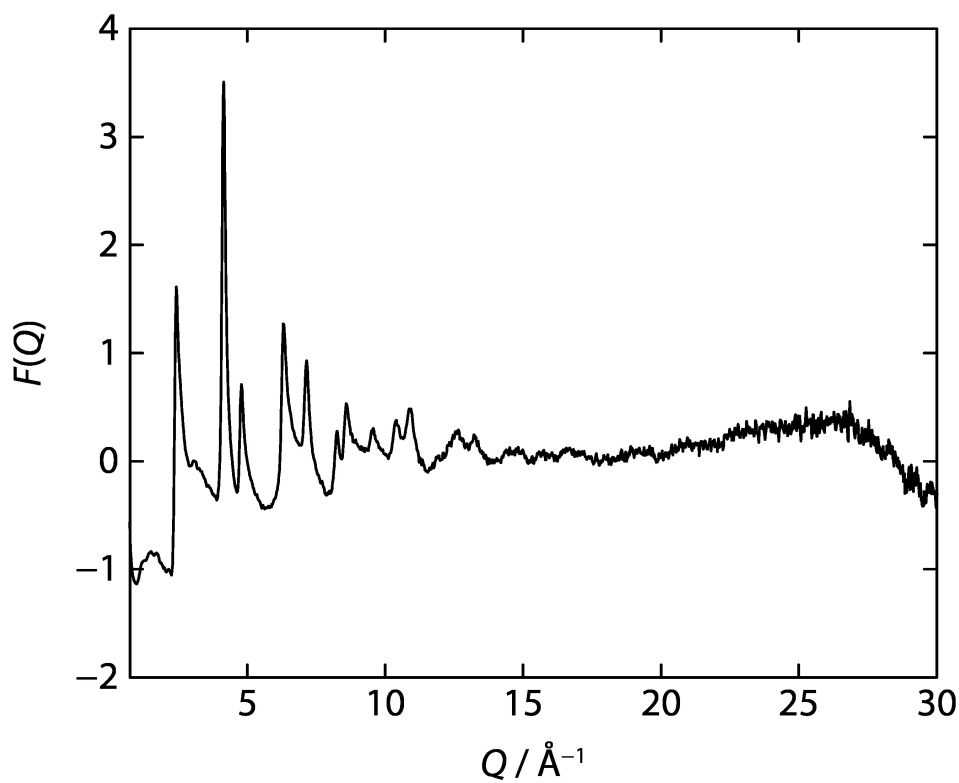

Supplement: c4nr01265h2.pdf [file c4nr01265h2.pdf]

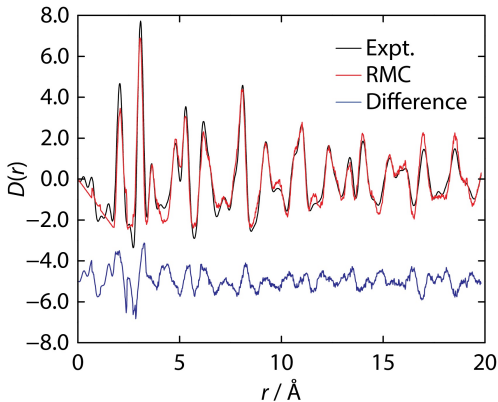

Supplement: c4nr01265h3.pdf [file c4nr01265h3.pdf]
